# Supplementary material for: Improving charge transport and reducing non-radiative energy loss via a nonacyclic carbazole-based third component for over 18% efficiency polymer solar cells
Source: Royal Society of Chemistry journal article supplement (doi:10.1039/d2ta00716a), 2022-01-01
Supplement: d2ta00716a1.pdf [file d2ta00716a1.pdf]

## Electronic Supplementary Information

### **Reducing Localized Over-aggregation and Non-radiative Energy Loss Enabled by a Nonacyclic Carbazole-Based Third Component for Over 18% Efficiency Polymer Solar Cells**

*Yongshuai Gong,<sup>a</sup> Runnan Yu,<sup>a</sup> Huaizhi Gao,<sup>a</sup> Zongwen Ma,<sup>a</sup> Yiman Dong,<sup>a</sup> Yi-Jia Su,<sup>b</sup> Tsung-Wei Chen,<sup>b</sup> Chain-Shu Hsu,<sup>\*b</sup> and Zhan'ao Tan<sup>\*a</sup>*

*<sup>a</sup> Beijing Advanced Innovation Center for Soft Matter Science and Engineering, State Key Laboratory of Organic-Inorganic Composites, Beijing University of Chemical Technology Beijing 100029, China.*

*E-mail: tanzhanao@mail.buct.edu.cn*

*<sup>b</sup> Department of Applied Chemistry and Center for Emergent Functional Matter Science, National Yang Ming Chiao Tung University, 1001 University Road, Hsinchu 30010, Taiwan.*

*E-mail: cshsu@mail.nctu.edu.tw*

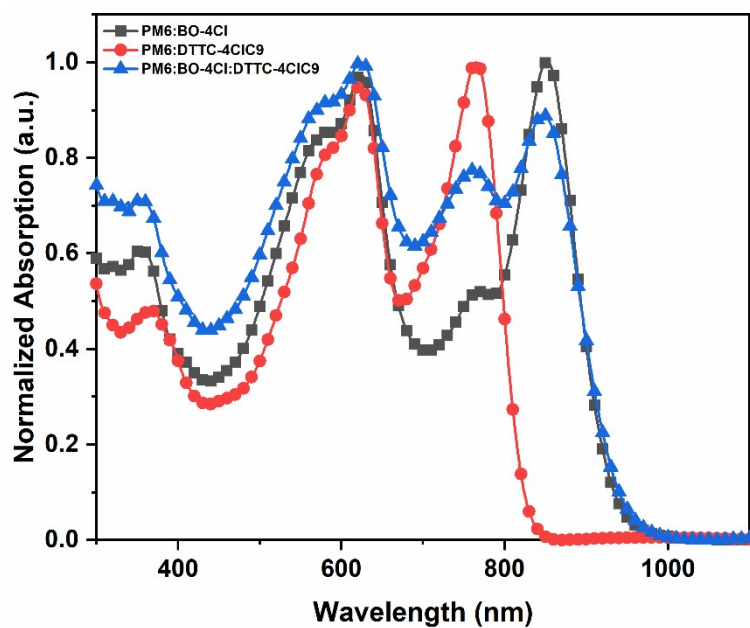

Fig. S1. UV-vis absorption of the binary and ternary blend films.

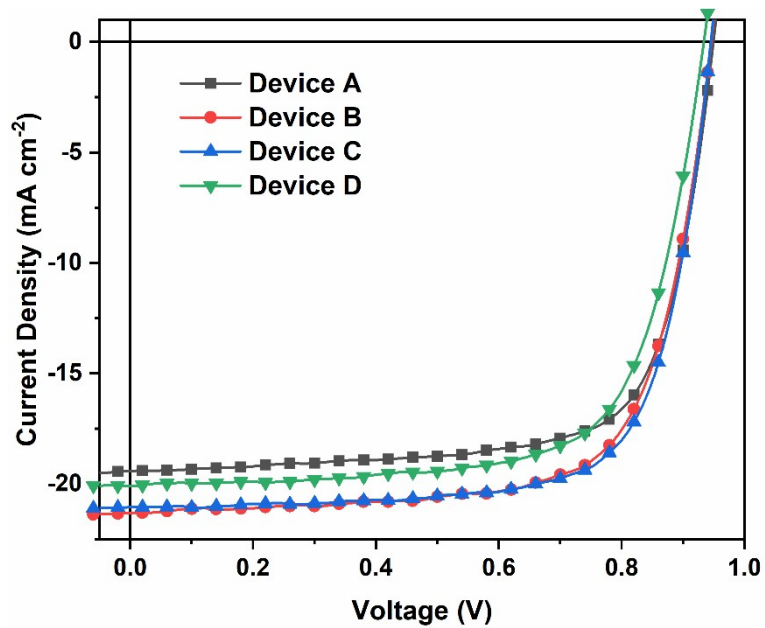

Fig. S2. Optimization of PM6:DTTC-4ClC9 based binary devices.

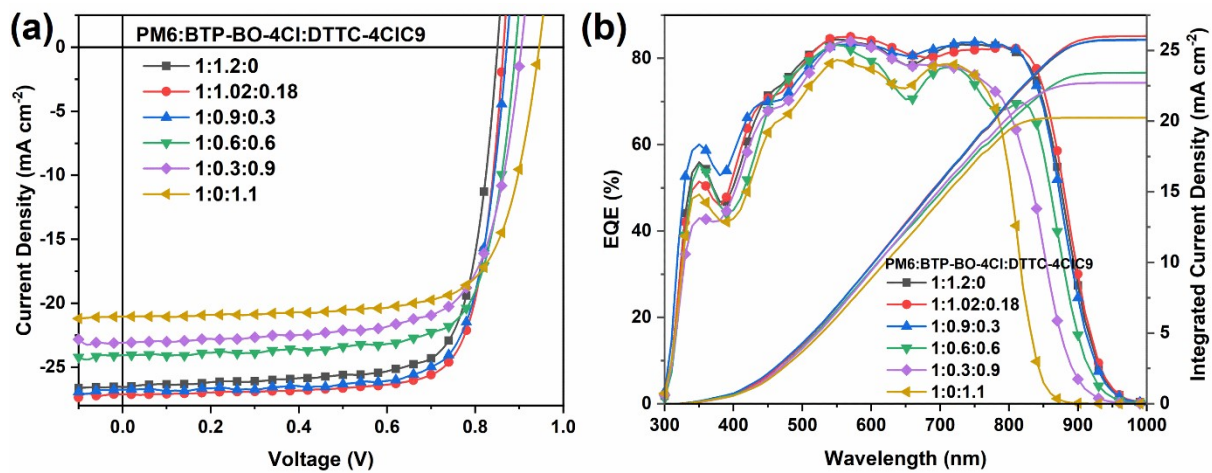

**Fig. S3.** (a)  $J$ - $V$  curves and (b) EQE spectra of the PM6:BTP-BO-4Cl:DTCC-4ClC9 based devices with different ratio.

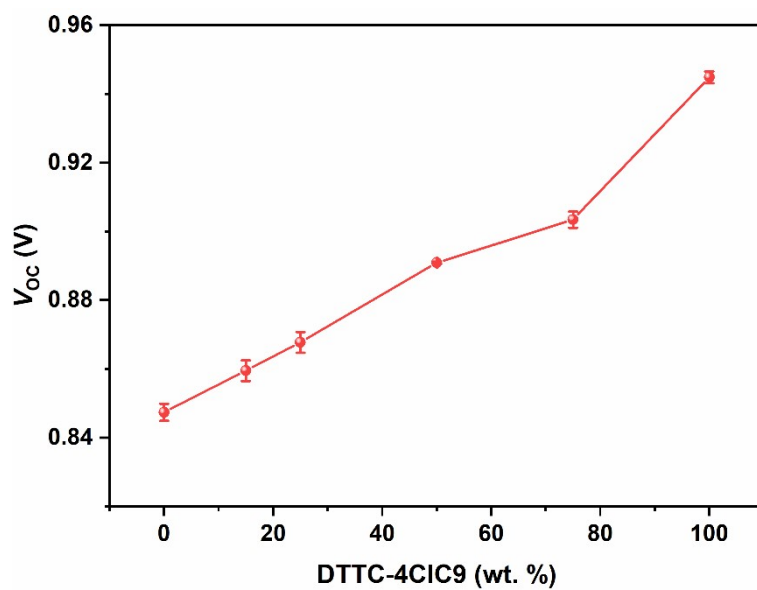

**Fig. S4.** The variation of  $V_{OC}$  of all devices with different DTTC-4ClC9 contents.

(a) WCA

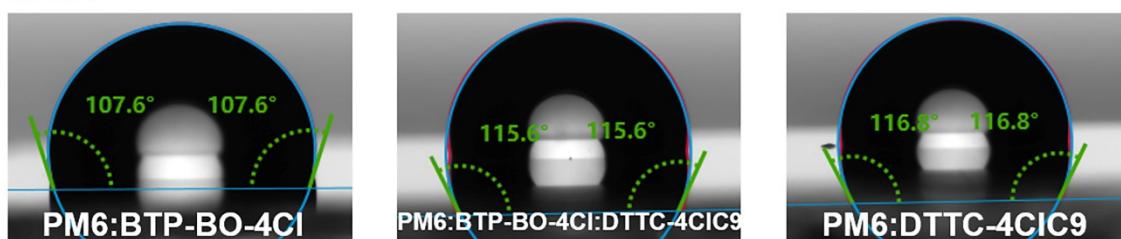

(b) DCA

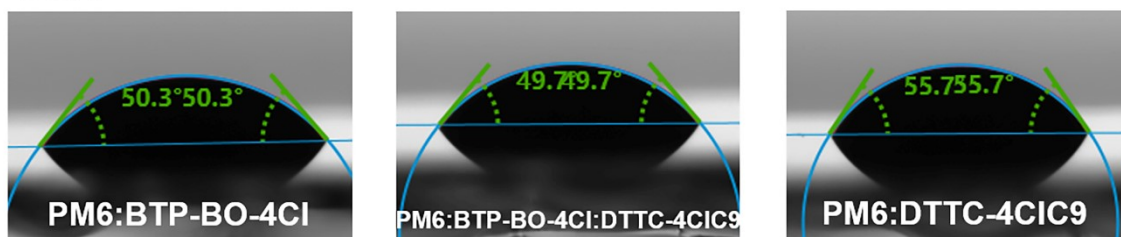

**Fig. S5.** (a) Water and (b) diiodomethane contact angle of PM6:BTP-BO-4Cl, PM6:BTP-BO-4Cl:DTTC-4ClC9, and PM6:DTTC-4ClC9 blend films.

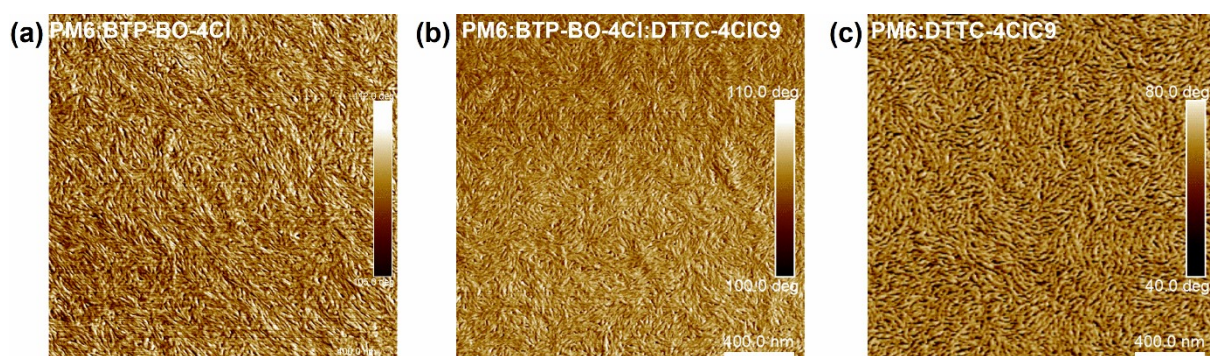

**Fig. S6.** AFM phase images of PM6:BTP-BO-4Cl, PM6:BTP-BO-4Cl:DTTC-4ClC9, and PM6:DTTC-4ClC9 blend films.

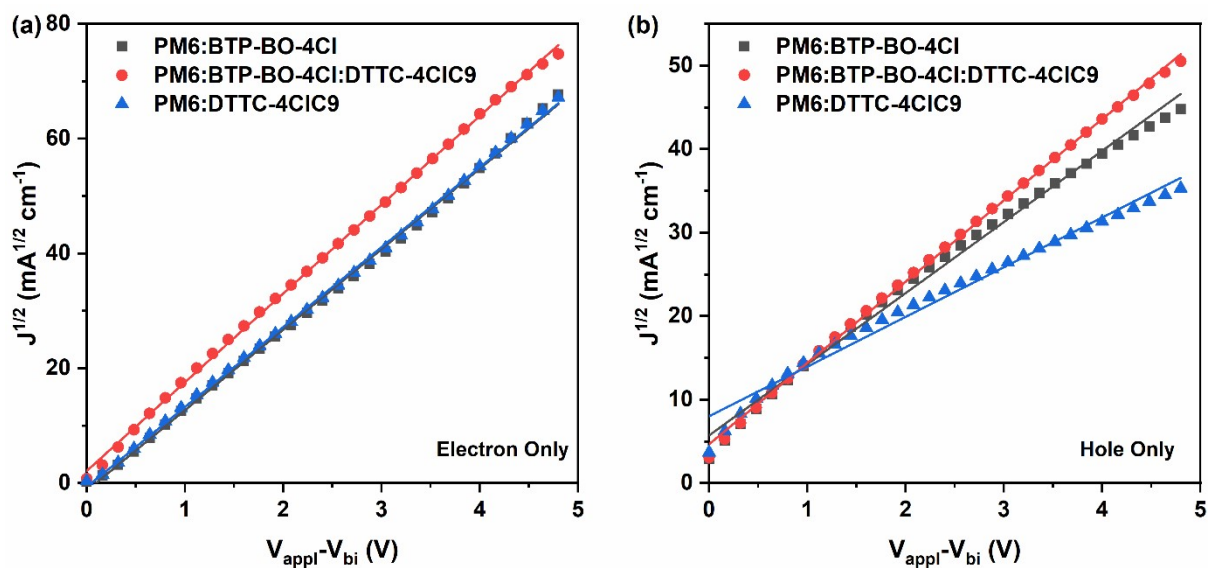

**Fig. S7.** (a) The electron and (b) hole mobility of PM6:BTP-BO-4Cl, PM6:BTP-BO-4Cl:DTTC-4ClC9 and PM6:DTTC-4ClC9 blend films measured by SCLC method.

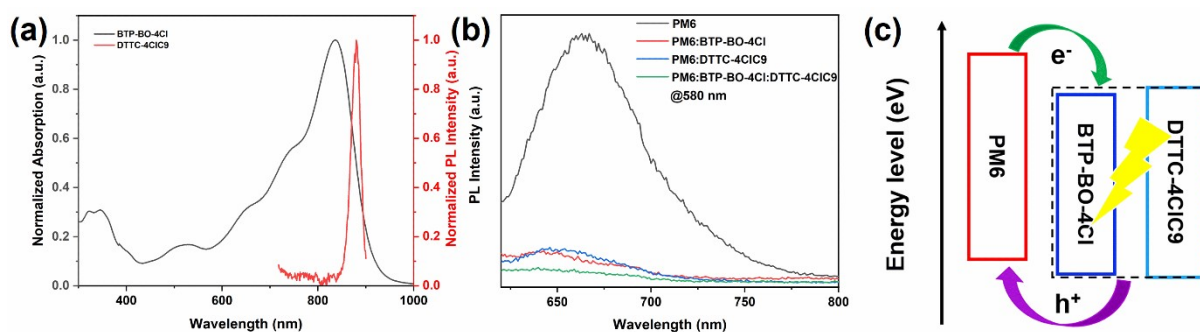

**Fig. S8.** (a) Normalized absorption spectrum of neat BTP-BO-4Cl film and normalized PL spectrum of neat DTTC-4ClC9 film, (b) PL spectra of PM6, PM6:BTP-BO-4Cl, PM6:BTP-BO-4Cl:DTTC-4ClC9, and PM6:DTTC-4ClC9 films excited at 580 nm, and (c) schematic of the charge transfer process in the ternary blend.

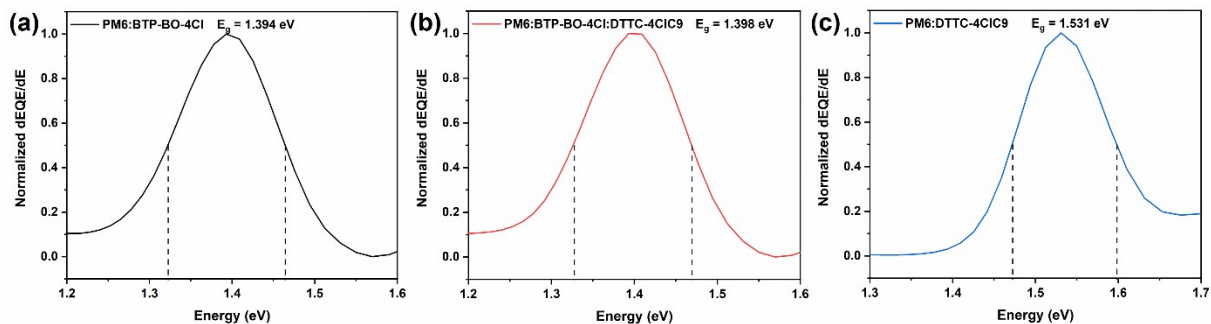

**Fig. S9.** Optical bandgap determination of (a) PM6:BTP-BO-4Cl, (b) PM6:BTP-BO-4Cl:DTTC-4ClC9, and (c) PM6:DTTC-4ClC9 blends. The region between dashed lines is the part where the gap distribution probability is greater than half of the maximum, which is used for the bandgap calculation.

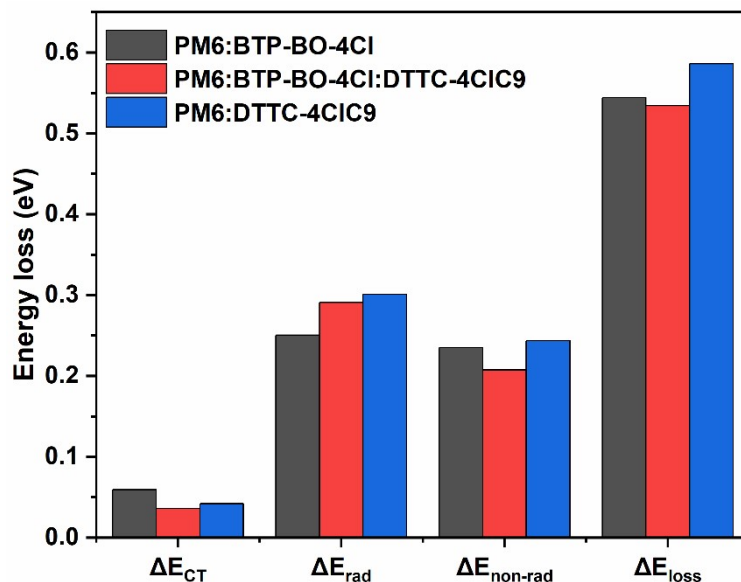

**Fig. S10.** Total energy loss ( $E_{loss}$ ) and different contributions to  $E_{loss}$  in the binary and ternary solar cells.

**Table S1.** Summary of photovoltaic parameters of the PM6:DTCC-4ClC9 based binary devices fabricated under different conditions.

| Ratio    | $V_{OC}$ [V] | $J_{SC}$ [ $\text{mA cm}^{-2}$ ] | FF [%] | Best PCE [%] |
|----------|--------------|----------------------------------|--------|--------------|
| Device A | 0.949        | 19.42                            | 72.25  | 13.31        |
| Device B | 0.945        | 21.31                            | 70.71  | 14.25        |
| Device C | 0.945        | 21.05                            | 72.92  | 14.50        |
| Device D | 0.933        | 20.09                            | 69.85  | 13.10        |

Fabrication condition:

Device A: Donor concentration ( $C_D$ ) is 7 mg/mL, spin-coating speed is 3000 rpm.

Device B:  $C_D$  is 8 mg/mL, spin-coating speed is 3000 rpm.

Device C:  $C_D$  is 8 mg/mL, spin-coating speed is 4000 rpm.

Device D:  $C_D$  is 9 mg/mL, spin-coating speed is 4000 rpm, annealing 100 °C for 10 min.

**Table S2.** Summary of photovoltaic parameters of the PM6:BTP-BO-4Cl:DTCC-4ClC9 based devices with different ratio.

| Ratio      | $V_{OC}$<br>[V] | $J_{SC}$<br>[mA cm <sup>-2</sup> ] | $J_{SC}^{a)}$<br>[mA cm <sup>-2</sup> ] | FF<br>[%] | PCE <sup>b)</sup><br>[%] |
|------------|-----------------|------------------------------------|-----------------------------------------|-----------|--------------------------|
| 1:1.2      | 0.850           | 26.54                              | 25.77                                   | 75.86     | 17.11 (16.90 ± 0.14)     |
| 1:0.2:0.18 | 0.864           | 27.12                              | 26.01                                   | 77.76     | 18.21 (17.91 ± 0.15)     |
| 1:0.9:0.3  | 0.871           | 26.75                              | 25.73                                   | 76.40     | 17.80 (17.27 ± 0.27)     |
| 1:0.6:0.6  | 0.891           | 24.06                              | 23.42                                   | 75.27     | 16.14 (15.68 ± 0.29)     |
| 1:0.3:0.9  | 0.905           | 23.09                              | 22.71                                   | 71.77     | 14.99 (14.60 ± 0.32)     |
| 1:1.1      | 0.945           | 21.05                              | 20.24                                   | 72.92     | 14.50 (14.34 ± 0.13)     |

<sup>a)</sup> Integrated  $J_{SC}$  calculated from EQE.

<sup>b)</sup> Average values were obtained from over 10 individual devices.

**Table S3.** Surface energy characteristics of the PM6, BTP-BO-4Cl, DTCC-4ClC9, and BTP-BO-4Cl:DTTC-4ClC9 films and the related Flory–Huggins interaction parameters ( $\chi$ ).

| Material              | WCA<br>(°) | DCA<br>(°) | $\gamma$<br>(mN m <sup>-1</sup> ) | Blend                     | $\chi$ |
|-----------------------|------------|------------|-----------------------------------|---------------------------|--------|
| PM6                   | 104.1      | 50.2       | 36.21                             | PM6:BTP-BO-4Cl            | 0.25K  |
| BTP-BO-4Cl            | 101.4      | 39.6       | 42.46                             | PM6:DTTC-4ClC9            | 1.13K  |
| DTTC-4ClC9            | 107.2      | 36.8       | 50.02                             | BTP-BO-4Cl:DTTC-4ClC9     | 0.31K  |
| BTP-BO-4Cl:DTTC-4ClC9 | 101.8      | 37.8       | 43.73                             | PM6:BTP-BO-4Cl:DTTC-4ClC9 | 0.35K  |

**Table S4.** Surface energy characteristics of the PM6:BTP-BO-4Cl, PM6:BTP-BO-4Cl:DTTC-4ClC9, and PM6:DTTC-4ClC9 blend films.

| Blend film                 | WCA (°) | DCA (°) | $\gamma$ (mN m <sup>-1</sup> ) |
|----------------------------|---------|---------|--------------------------------|
| PM6:BTP-BO-4Cl             | 107.6   | 50.3    | 37.25                          |
| PM6:BTP-BO-4Cl: DTTC-4ClC9 | 115.6   | 49.7    | 41.12                          |
| PM6:DTTC-4ClC9             | 116.8   | 55.7    | 36.77                          |

**Table S5.** Crystal coherence lengths of the (010) peak and the d-spacing for the blend films.

| Active Layer              | $q$<br>( $\text{\AA}^{-1}$ ) | d-spacing<br>( $\text{\AA}$ ) | FWHM<br>( $\text{\AA}^{-1}$ ) | CCL<br>(nm) |
|---------------------------|------------------------------|-------------------------------|-------------------------------|-------------|
| PM6:BTP-BO-4Cl            | 1.725                        | 3.64                          | 0.3911                        | 1.61        |
| PM6:BTP-BO-4Cl:DTTC-4ClC9 | 1.741                        | 3.61                          | 0.3867                        | 1.63        |
| PM6:DTTC-4ClC9            | 1.703                        | 3.69                          | 0.4978                        | 1.26        |

**Table S6.** Crystal coherence lengths of the (100) peak and the d-spacing for the blend films.

| Active Layer              | $q$<br>( $\text{\AA}^{-1}$ ) | d-spacing<br>( $\text{\AA}$ ) | FWHM<br>( $\text{\AA}^{-1}$ ) | CCL<br>(nm) |
|---------------------------|------------------------------|-------------------------------|-------------------------------|-------------|
| PM6:BTP-BO-4Cl            | 0.297                        | 21.16                         | 0.1046                        | 6.01        |
| PM6:BTP-BO-4Cl:DTTC-4ClC9 | 0.297                        | 21.16                         | 0.0986                        | 6.37        |
| PM6:DTTC-4ClC9            | 0.273                        | 23.02                         | 0.0868                        | 7.24        |

**Table S7.** Summary of photovoltaic parameters of the recent reported ternary PSCs.

| Host blend      | Third component              | $V_{OC}$<br>[V] | $J_{SC}$<br>[mA cm <sup>-2</sup> ] | FF<br>[%]  | Best PCE<br>[%] | Ref. |
|-----------------|------------------------------|-----------------|------------------------------------|------------|-----------------|------|
| PM6:Y6          | IDTT-M <sup>a)</sup>         | 0.872           | 25.81                              | 73.89      | 16.63           | 1    |
| PM6:Y6          | 3TP3T-4F <sup>a)</sup>       | 0.85 ± 0.01     | 25.9 ± 0.3                         | 74.9 ± 1.0 | 16.7            | 2    |
| PM6:Y6          | IDTP-4F <sup>a)</sup>        | 0.863           | 25.7                               | 77.2       | 17.1            | 3    |
| PM6:Y6          | MOITIC <sup>a)</sup>         | 0.882           | 25.6                               | 75.7       | 17.1            | 4    |
| PM6:BTP-4F-12   | IT-M <sup>a)</sup>           | 0.875           | 25.95                              | 78.02      | 17.71           | 5    |
| PBQx-TF:eC9-2Cl | F-BTA3 <sup>a)</sup>         | 0.879           | 26.7                               | 80.9       | 19.0            | 6    |
| PM6:BTP-ClBr1   | BTP-2O-4Cl-C12 <sup>b)</sup> | 0.891           | 25.45                              | 75.8       | 17.19           | 7    |
| PM6:Y6          | BTIC-EH-2ThBr <sup>b)</sup>  | 0.853           | 26.39                              | 77.90      | 17.54           | 8    |
| PM6:Y6          | AQx-3 <sup>b)</sup>          | 0.870           | 26.82                              | 77.2       | 18.01           | 9    |



| Host blend     | Third component          | $V_{OC}$<br>[V] | $J_{SC}$<br>[mA cm <sup>-2</sup> ] | FF<br>[%]   | Best PCE<br>[%] | Ref.             |
|----------------|--------------------------|-----------------|------------------------------------|-------------|-----------------|------------------|
| PM6:BO-4Cl     | BTP-S2 <sup>b), c)</sup> | 0.861           | 27.14                              | 78.04       | 18.16           | 10               |
| PM6:BTP-eC9    | BTP-F <sup>b)</sup>      | 0.858           | 26.99                              | 79.7        | 18.45           | 11               |
| PM6:Y6         | TPD-3F <sup>d)</sup>     | 0.88 ± 0.01     | 25.6 ± 0.18                        | 73.4 ± 0.90 | 17.0            | 12               |
| PM6:Y6         | DRTB-T-C4 <sup>d)</sup>  | 0.854           | 24.68                              | 80.88       | 17.05           | 13               |
| PM6:Y6         | DRTB-T-C4 <sup>d)</sup>  | 0.85            | 24.79                              | 81.3        | 17.13           | 14               |
| PM7:Y7         | SiCl-BDT <sup>d)</sup>   | 0.86 ± 0.02     | 27.73 ± 0.32                       | 70.43 ± 3.0 | 17.40           | 15               |
| PM6:Y6         | S3 <sup>d)</sup>         | 0.856           | 25.86                              | 79.17       | 17.53           | 16               |
| PM6:Y6         | BTTzR <sup>d)</sup>      | 0.87            | 26.2                               | 77.7        | 17.7            | 17               |
| PM6:BTP-eC9    | BPR-SCl <sup>d)</sup>    | 0.856           | 27.13                              | 0.776       | 18.02           | 18               |
| PM6:BTP-eC9    | PB2F <sup>d)</sup>       | 0.863           | 26.8                               | 80.4        | 18.6            | 19               |
| PM6:BTP-BO-4Cl | BTP-T-3Cl <sup>b)</sup>  | 0.857           | 27.38                              | 77.73       | 18.21           | 20               |
| PM6:BTP-BO-4Cl | DTTC-4ClC9               | 0.864           | 27.12                              | 77.76       | 18.21           | <b>This work</b> |

<sup>a)</sup> ITIC derivatives; <sup>b)</sup> BTP-series acceptors; <sup>c)</sup> layer-by-layer device; <sup>d)</sup> a second donor.

## References

1. L. G. Xiao, X. Wu, G. X. Ren, M. A. Kolaczowski, G. Huang, W. Y. Tan, L. Ma, Y. D. Liu, X. B. Peng, Y. G. Min and Y. Liu, *Adv. Funct. Mater.*, 2021, **31**, 2105304.
2. J. L. Song, C. Li, L. Zhu, J. Guo, J. Q. Xu, X. N. Zhang, K. K. Weng, K. N. Zhang, J. Min, X. T. Hao, Y. Zhang, F. Liu and Y. M. Sun, *Adv. Mater.*, 2019, **31**, 1905645.
3. J. Hu, Q. Guo, J. Fang, Q. Liu, H. Liang, J. Lv, Z. Yin, J. Lin, X. Ou, X. Guo and M. Zhang, *Org. Electron.*, 2021, **95**, 106201.
4. M. Xiong, J. Wu, Q. Fan, Q. Liu, J. Lv, X. Ou, X. Guo and M. Zhang, *Org. Electron.*, 2021, **96**, 106227.
5. J. Gao, X. Ma, C. Xu, X. Wang, J. H. Son, S. Y. Jeong, Y. Zhang, C. Zhang, K. Wang, L. Niu, J. Zhang, H. Y. Woo, J. Zhang and F. Zhang, *Chem. Eng. J.*, 2022, **428**, 129276.
6. Y. Cui, Y. Xu, H. Yao, P. Bi, L. Hong, J. Zhang, Y. Zu, T. Zhang, J. Qin, J. Ren, Z. Chen, C. He, X. Hao, Z. Wei and J. Hou, *Adv. Mater.*, 2021, **33**, 2102420.
7. R. Ma, Y. Tao, Y. Chen, T. Liu, Z. Luo, Y. Guo, Y. Xiao, J. Fang, G. Zhang, X. Li, X. Guo, Y. Yi, M. Zhang, X. Lu, Y. Li and H. Yan, *Sci. China Chem.*, 2021, **64**, 581-589.
8. C. C. Cao, H. J. Lai, H. Chen, Y. L. Zhu, M. R. Pu, N. Zheng and F. He, *J. Mater. Chem. A*, 2021, **9**, 16418-16426.
9. F. Liu, L. Zhou, W. R. Liu, Z. C. Zhou, Q. H. Yue, W. Y. Zheng, R. Sun, W. Y. Liu, S. J. Xu, H. J. Fan, L. H. Feng, Y. P. Yi, W. K. Zhang and X. Z. Zhu, *Adv. Mater.*, 2021, **33**, 2100830.
10. L. Zhan, S. Li, X. Xia, Y. Li, X. Lu, L. Zuo, M. Shi and H. Chen, *Adv. Mater.*, 2021, **12**, 2007231.
11. Y. Li, Y. H. Cai, Y. P. Xie, J. H. Song, H. B. Wu, Z. Tang, J. Zhang, F. Huang and Y. M. Sun, *Energ. Environ. Sci.*, 2021, **14**, 5009-5016.

12. B. H. Jiang, Y. P. Wang, C. Y. Liao, Y. M. Chang, Y. W. Su, R. J. Jeng and C. P. Chen, *Acs Appl. Mater. Inter.*, 2021, **13**, 1076-1085.
13. Y. Zeng, D. Li, Z. Xiao, H. Wu, Z. Chen, T. Hao, S. Xiong, Z. Ma, H. Zhu, L. Ding and Q. Bao, *Adv. Energy. Mater.*, 2021, **11**, 2101338.
14. D. Q. Li, L. Zhu, X. J. Liu, W. Xiao, J. M. Yang, R. R. Ma, L. M. Ding, F. Liu, C. G. Duan, M. Fahlman and Q. Y. Bao, *Adv. Mater.*, 2020, **32**, 2002344.
15. T. Gokulnath, J. Choi, H.-Y. Park, K. Sung, Y. Do, H. Park, J. Kim, S. S. Reddy, J. Kim, M. Song, J. Yoon and S.-H. Jin, *Nano Energy*, 2021, **89**, 106323.
16. Q. An, J. Wang, X. Ma, J. Gao, Z. Hu, B. Liu, H. Sun, X. Guo, X. Zhang and F. Zhang, *Energ. Environ. Sci.*, 2020, **13**, 5039-5047.
17. Q. Liu, Y. Wang, J. Fang, H. Liu, L. Zhu, X. Guo, M. Gao, Z. Tang, L. Ye, F. Liu, M. Zhang and Y. Li, *Nano Energy*, 2021, **85**, 105963.
18. X. Chen, D. Wang, Z. Wang, Y. Li, H. Zhu, X. Lu, W. Chen, H. Qiu and Q. Zhang, *Chem. Eng. J.*, 2021, **424**, 130397.
19. T. Zhang, C. An, P. Bi, Q. Lv, J. Qin, L. Hong, Y. Cui, S. Zhang and J. Hou, *Adv. Energy. Mater.*, 2021, **n/a**, 2101705.
20. Y. Pan, X. Zheng, J. Guo, Z. Chen, S. Li, C. He, S. Ye, X. Xia, S. Wang, X. Lu, H. Zhu, J. Min, L. Zuo, M. Shi and H. Chen, *Adv. Funct. Mater.*, 2021, DOI: 10.1002/adfm.202108614, 2108614.
